# Supplementary material
Source: bioRxiv or medRxiv preprint supplement (https://www.biorxiv.org/highwire/filestream/108521/field_highwire_adjunct_files/9/358622-9.pdf)

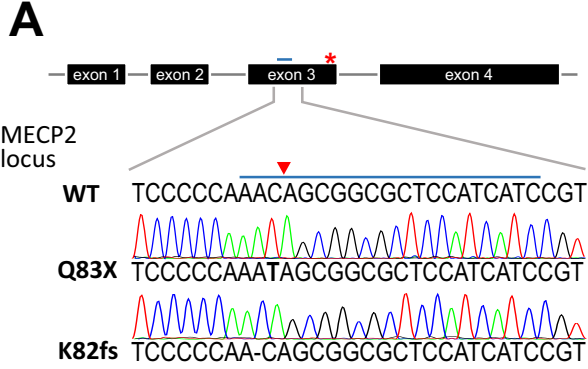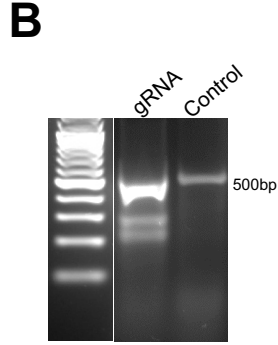

**C**

| Exon sequencing |          | WT  | Del |
|-----------------|----------|-----|-----|
| Sample          | Coverage |     |     |
| WT82            | 117      | 117 | 0   |
| K82fs           | 161      | 0   | 161 |

  

| WT82 vs K82fs (off-target mutations) |           |           |          |        |
|--------------------------------------|-----------|-----------|----------|--------|
| Chr                                  | Position  | Reference | Mutation | Gene   |
| 5                                    | 76373240  | A         | G        | ZBED3  |
| 14                                   | 105414790 | A         | G        | AHNAK2 |
| 11                                   | 5685385   | C         | T        | TRIM5  |
| 4                                    | 22438154  | C         | A        | GPR125 |
| 17                                   | 38975328  | G         | A        | KRT10  |

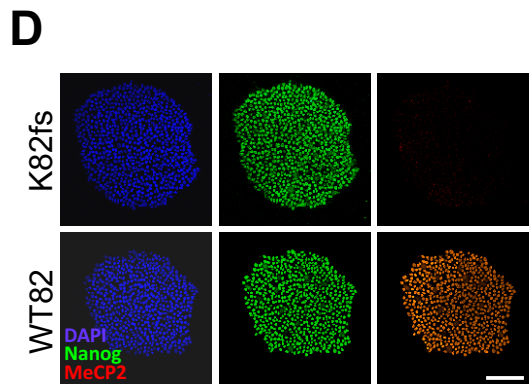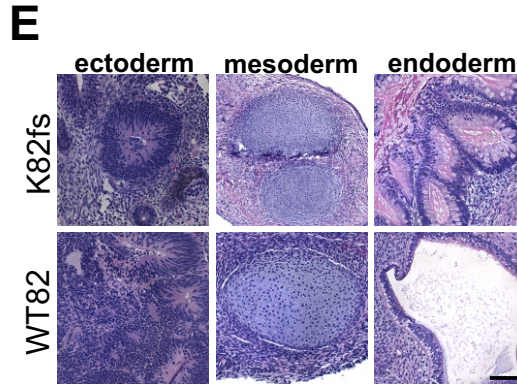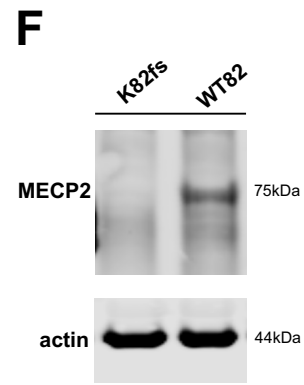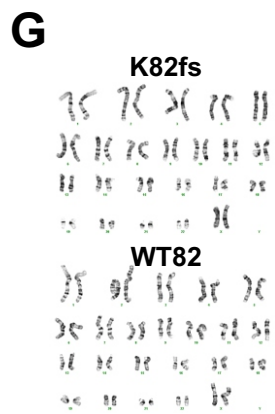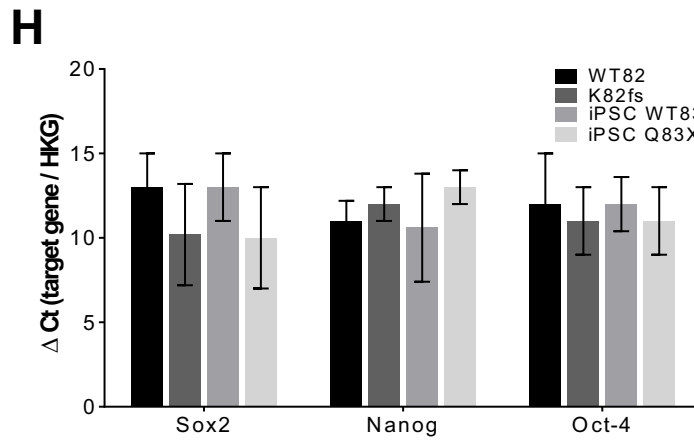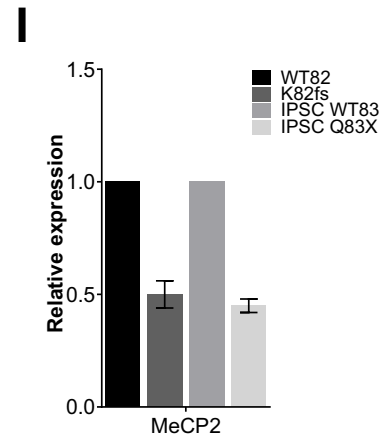

Supplement: Supplementary file [file 358622-9.pdf]
